# Supplementary material
Source: PubMed Central journal article supplement (PMC6927503)
Supplement: ehp-127-117002-s001.pdf [file ehp-127-117002-s001.pdf]

**Note to readers with disabilities:** *EHP* strives to ensure that all journal content is accessible to all readers. However, some figures and Supplemental Material published in *EHP* articles may not conform to [508 standards](#) due to the complexity of the information being presented. If you need assistance accessing journal content, please contact [ehp508@niehs.nih.gov](mailto:ehp508@niehs.nih.gov). Our staff will work with you to assess and meet your accessibility needs within 3 working days.

### **Supplemental Material**

#### **Perfluoroalkyl Substances and Maternal Thyroid Hormones in Early Pregnancy; Findings in the Danish National Birth Cohort**

Kosuke Inoue, Beate Ritz, Stine Linding Andersen, Cecilia Høst Ramlau-Hansen, Birgit Bjerre Høyer, Bodil Hammer Bech, Tine Brink Henriksen, Eva Cecilie Bonefeld-Jørgensen, Jørn Olsen, and Zeyan Liew

#### **Table of Contents**

**Table S1.** Detection and quantitation limits of the PFAS.

**Table S2.** Study specific range of the PFAS concentrations in each quartile (ng/ml).

**Table S3.** Pearson Correlation Coefficients between the PFAS (ng/ml).

**Table S4.** Distribution of TSH and ft4 in each gestational week.

**Table S5.** Association between maternal thyroid hormones and PFAS levels (ng/ml) additionally adjusted for fish intake, geographical residence, and alcohol intake during pregnancy.

**Table S6.** Association between maternal thyroid hormones and PFAS levels in multiple PFAS models.

**Table S7.** Association between maternal thyroid hormones and PFAS levels (ng/ml) stratified by socio-economic status, parity, smoking, birth year, and geographical residence, maternal age, and alcohol intake.

**Table S8.** Estimated maternal TSH and ft4 levels in each gestational week according to high or low PFAS exposure.

**Table S9.** Association between maternal thyroid hormones and binary PFAS variables (>75<sup>th</sup> vs. ≤75<sup>th</sup> as reference) according to gestational week (<10, ≥10).

**Table S10.** Gestational week-specific high or low thyroid hormones status according to plasma PFAS levels (ng/ml) among 1,061 women included in study sample 3.

**Table S11.** Gestational week-specific high or low thyroid hormones status according to plasma PFAS levels (ng/ml) excluding women with thyroid diseases (n=1,329).

**Figure S1.** The directed acyclic graph constructed for this study.

**Figure S2.** Adjusted TSH and fT4 levels in each gestational week according to PFAS levels (the 1<sup>st</sup> quartile vs the 4<sup>th</sup> quartile).

**Figure S3.** Adjusted TSH and fT4 levels in each gestational week according to binary PFAS exposure, mutual adjustment of all six PFAS in the same model.

**Table S1.** Detection and quantitation limits of the PFAS

|              | Lower limit of detection (ng/ml) <sup>a</sup> | Lower limit of quantitation (ng/ml) <sup>a</sup> | N (%) >LLOQ |           |             |
|--------------|-----------------------------------------------|--------------------------------------------------|-------------|-----------|-------------|
|              |                                               |                                                  | Sample 1    | Sample 2  | Sample 3    |
| <b>PFOS</b>  | 0.09                                          | 0.28                                             | 188 (100%)  | 97 (100%) | 1081 (100%) |
| <b>PFOA</b>  | 0.07                                          | 0.20                                             | 188 (100%)  | 97 (100%) | 1081 (100%) |
| <b>PFHxS</b> | 0.03                                          | 0.08                                             | NA          | 95 (98%)  | 1081 (100%) |
| <b>PFNA</b>  | 0.09                                          | 0.27                                             | NA          | 87 (90%)  | 1016 (93%)  |
| <b>PFHpS</b> | 0.04                                          | 0.11                                             | NA          | 91 (94%)  | 1074 (99%)  |
| <b>PFDA</b>  | 0.03                                          | 0.09                                             | NA          | 83 (86%)  | 1037 (96%)  |

<sup>a</sup> The limit is for sample 2 and 3 from Aarhus Lab. There was no lower limit reported from 3M lab say because all PFOS and PFOA were detected.

**Table S2.** Study specific range of the PFAS concentrations in each quartile (ng/ml)

|              | Sample 1  | Sample 2  | Sample 3  |
|--------------|-----------|-----------|-----------|
| <b>PFOS</b>  |           |           |           |
| Quartile 1   | ≤27.3     | ≤18.7     | ≤22.2     |
| Quartile 2   | 27.4-33.9 | 18.8-29.6 | 22.3-28.5 |
| Quartile 3   | 34.0-43.5 | 29.7-37.0 | 28.6-36.4 |
| Quartile 4   | 43.6-71.9 | 37.1-61.6 | 36.5-91.4 |
| <b>PFOA</b>  |           |           |           |
| Quartile 1   | ≤3.88     | ≤2.86     | ≤3.33     |
| Quartile 2   | 3.89-5.40 | 2.87-4.12 | 3.34-4.43 |
| Quartile 3   | 5.41-7.07 | 4.13-5.84 | 4.44-5.62 |
| Quartile 4   | 7.08-41.5 | 5.85-9.30 | 5.63-13.3 |
| <b>PFHxS</b> |           |           |           |
| Quartile 1   | NA        | ≤0.57     | ≤0.84     |
| Quartile 2   | NA        | 0.58-0.93 | 0.85-1.12 |
| Quartile 3   | NA        | 0.94-1.23 | 1.13-1.40 |
| Quartile 4   | NA        | 1.24-3.22 | 1.41-12.8 |
| <b>PFNA</b>  |           |           |           |
| Quartile 1   | NA        | ≤0.33     | ≤0.36     |
| Quartile 2   | NA        | 0.34-0.41 | 0.37-0.45 |
| Quartile 3   | NA        | 0.42-0.51 | 0.46-0.57 |
| Quartile 4   | NA        | 0.52-1.03 | 0.58-2.16 |
| <b>PFHpS</b> |           |           |           |
| Quartile 1   | NA        | ≤0.19     | ≤0.27     |
| Quartile 2   | NA        | 0.20-0.30 | 0.28-0.37 |
| Quartile 3   | NA        | 0.31-0.43 | 0.38-0.49 |
| Quartile 4   | NA        | 0.44-0.77 | 0.50-1.52 |
| <b>PFDA</b>  |           |           |           |
| Quartile 1   | NA        | ≤0.10     | ≤0.13     |
| Quartile 2   | NA        | 0.11-0.16 | 0.14-0.17 |
| Quartile 3   | NA        | 0.17-0.23 | 0.18-0.21 |
| Quartile 4   | NA        | 0.24-0.43 | 0.22-0.90 |

**Table S3.** Pearson Correlation Coefficients between the PFAS (ng/ml) <sup>a</sup>

|              | <b>PFOS</b> | <b>PFOA</b> | <b>PFHxS</b> | <b>PFNA</b> | <b>PFHpS</b> |
|--------------|-------------|-------------|--------------|-------------|--------------|
| <b>PFOA</b>  | 0.65        | -           | -            | -           | -            |
| <b>PFHxS</b> | 0.32        | 0.32        | -            | -           | -            |
| <b>PFNA</b>  | 0.46        | 0.45        | 0.27         | -           | -            |
| <b>PFHpS</b> | 0.89        | 0.66        | 0.43         | 0.53        | -            |
| <b>PFDA</b>  | 0.42        | 0.24        | 0.18         | 0.75        | 0.43         |

<sup>a</sup> Based on 1178 samples with values of all six PFAS. The correlation coefficient between PFOS and PFOA in all 1366 samples were 0.60.

**Table S4. Distribution of TSH and fT4 in each gestational week.**

| Gestational week | N   | TSH (mIU/L)             |                             |                             |                             | fT4 (pmol/L)            |                             |                             |                             |
|------------------|-----|-------------------------|-----------------------------|-----------------------------|-----------------------------|-------------------------|-----------------------------|-----------------------------|-----------------------------|
|                  |     | Geometric mean [95% CI] | 10 <sup>th</sup> percentile | 50 <sup>th</sup> percentile | 90 <sup>th</sup> percentile | Geometric mean [95% CI] | 10 <sup>th</sup> percentile | 50 <sup>th</sup> percentile | 90 <sup>th</sup> percentile |
| <b>5-6</b>       | 285 | 1.56<br>[1.44-1.68]     | 0.88                        | 1.54                        | 3.32                        | 14.4<br>[14.2-14.6]     | 12.5                        | 14.4                        | 16.4                        |
| <b>7</b>         | 248 | 1.27<br>[1.16-1.39]     | 0.52                        | 1.23                        | 2.93                        | 14.2<br>[14.0-14.4]     | 12.3                        | 14.1                        | 16.5                        |
| <b>8</b>         | 260 | 0.99<br>[0.89-1.11]     | 0.37                        | 1.09                        | 2.49                        | 14.2<br>[14.0-14.4]     | 12.2                        | 14.0                        | 16.9                        |
| <b>9</b>         | 208 | 0.93<br>[0.81-1.07]     | 0.28                        | 1.05                        | 2.52                        | 14.4<br>[14.2-14.7]     | 12.4                        | 14.3                        | 16.7                        |
| <b>10</b>        | 149 | 0.97<br>[0.86-1.10]     | 0.40                        | 1.01                        | 2.22                        | 14.4<br>[14.1-14.6]     | 12.3                        | 14.5                        | 16.5                        |
| <b>11</b>        | 111 | 1.04<br>[0.89-1.21]     | 0.43                        | 1.13                        | 2.42                        | 13.9<br>[13.6-14.2]     | 12.3                        | 13.8                        | 16.1                        |
| <b>12-19</b>     | 105 | 1.02<br>[0.86-1.23]     | 0.43                        | 1.09                        | 2.64                        | 13.7<br>[13.4-14.0]     | 11.6                        | 13.9                        | 15.7                        |

**Table S5. Association between maternal thyroid hormones and PFAS levels (ng/ml) additionally adjusted for fish intake, geographical residence, and alcohol intake during pregnancy.**

|                       | TSH (mIU/L)                                   |                                               | fT4 (pmol/L)                                  |                                               |
|-----------------------|-----------------------------------------------|-----------------------------------------------|-----------------------------------------------|-----------------------------------------------|
|                       | Relative % difference (95% CI) <sup>a,b</sup> | Absolute % Difference (95% CI) <sup>a,b</sup> | Relative % difference (95% CI) <sup>a,b</sup> | Absolute % Difference (95% CI) <sup>a,b</sup> |
| <b>PFOS (n=1366)</b>  |                                               |                                               |                                               |                                               |
| Per IQR increase      | 1.03 (0.95, 1.12)                             | 2.9 (-5.5, 12.1)                              | 1.00 (0.99, 1.02)                             | 0.3 (-1.1, 1.7)                               |
| Quartile 1            | Ref                                           | Ref                                           | Ref                                           | Ref                                           |
| Quartile 2            | 0.86 (0.70, 1.05)                             | -14.2 (-30.2, 5.4)                            | 1.02 (0.99, 1.06)                             | 2.4 (-0.7, 5.7)                               |
| Quartile 3            | 0.96 (0.78, 1.17)                             | -4.5 (-21.9, 16.9)                            | 1.02 (0.99, 1.05)                             | 1.8 (-1.1, 4.7)                               |
| Quartile 4            | 1.00 (0.82, 1.20)                             | -0.4 (-17.7, 20.4)                            | 1.01 (0.98, 1.04)                             | 0.6 (-2.5, 3.8)                               |
| <b>PFOA (n=1366)</b>  |                                               |                                               |                                               |                                               |
| Per IQR increase      | 1.00 (0.93, 1.08)                             | 0.3 (-6.9, 8.1)                               | 1.01 (0.99, 1.02)                             | 0.6 (-0.6, 1.8)                               |
| Quartile 1            | Ref                                           | Ref                                           | Ref                                           | Ref                                           |
| Quartile 2            | 0.96 (0.78, 1.18)                             | -4.2 (-22.1, 17.8)                            | 0.99 (0.97, 1.02)                             | -0.5 (-3.4, 2.4)                              |
| Quartile 3            | 1.01 (0.83, 1.23)                             | 1.0 (-17.1, 23.1)                             | 1.01 (0.98, 1.04)                             | 1.2 (-1.9, 4.3)                               |
| Quartile 4            | 1.06 (0.86, 1.32)                             | 6.5 (-14.0, 31.9)                             | 1.01 (0.98, 1.04)                             | 0.6 (-2.3, 3.6)                               |
| <b>PFHxS (n=1178)</b> |                                               |                                               |                                               |                                               |
| Per IQR increase      | 1.02 (0.96, 1.09)                             | 2.3 (-3.6, 8.8)                               | 1.00 (0.98, 1.01)                             | -0.3 (-1.6, 0.9)                              |
| Quartile 1            | Ref                                           | Ref                                           | Ref                                           | Ref                                           |
| Quartile 2            | 0.98 (0.79, 1.21)                             | -2.4 (-21.0, 20.7)                            | 0.99 (0.96, 1.02)                             | -1.0 (-4.1, 2.2)                              |
| Quartile 3            | 0.92 (0.68, 1.24)                             | -8.0 (-31.8, 24.2)                            | 1.01 (0.97, 1.05)                             | 1.1 (-2.9, 5.2)                               |
| Quartile 4            | 1.04 (0.84, 1.27)                             | 3.6 (-15.9, 27.5)                             | 1.02 (0.99, 1.06)                             | 2.2 (-1.2, 5.9)                               |
| <b>PFNA (n=1178)</b>  |                                               |                                               |                                               |                                               |
| Per IQR increase      | 1.01 (0.95, 1.07)                             | 0.8 (-4.9, 6.8)                               | 1.00 (0.99, 1.01)                             | -0.1 (-1.2, 0.9)                              |
| Quartile 1            | Ref                                           | Ref                                           | Ref                                           | Ref                                           |
| Quartile 2            | 0.96 (0.75, 1.24)                             | -3.8 (-25.4, 23.9)                            | 1.00 (0.96, 1.04)                             | -0.2 (-3.8, 3.6)                              |
| Quartile 3            | 1.01 (0.81, 1.25)                             | 0.9 (-18.7, 25.1)                             | 1.00 (0.97, 1.04)                             | 0.4 (-3.1, 3.9)                               |
| Quartile 4            | 1.03 (0.83, 1.28)                             | 2.9 (-17.1, 27.8)                             | 1.00 (0.96, 1.03)                             | -0.6 (-3.9, 2.8)                              |
| <b>PFHpS (n=1178)</b> |                                               |                                               |                                               |                                               |
| Per IQR increase      | 1.02 (0.93, 1.12)                             | 2.0 (-6.8, 11.5)                              | 1.00 (0.99, 1.02)                             | 0.1 (-1.3, 1.5)                               |
| Quartile 1            | Ref                                           | Ref                                           | Ref                                           | Ref                                           |
| Quartile 2            | 0.95 (0.74, 1.21)                             | -5.4 (-26.4, 21.4)                            | 1.00 (0.96, 1.03)                             | -0.4 (-3.7, 3.0)                              |
| Quartile 3            | 1.00 (0.81, 1.23)                             | -0.5 (-19.1, 22.5)                            | 1.02 (0.99, 1.05)                             | 1.7 (-1.5, 5.0)                               |
| Quartile 4            | 1.06 (0.85, 1.31)                             | 5.8 (-14.9, 31.3)                             | 1.00 (0.96, 1.03)                             | -0.4 (-3.7, 2.9)                              |
| <b>PFDA (n=1178)</b>  |                                               |                                               |                                               |                                               |
| Per IQR increase      | 0.98 (0.95, 1.09)                             | -1.9 (-7.7, 4.2)                              | 1.01 (1.00, 1.02)                             | 0.8 (-0.4, 1.9)                               |
| Quartile 1            | Ref                                           | Ref                                           | Ref                                           | Ref                                           |
| Quartile 2            | 0.96 (0.78, 1.18)                             | -3.7 (-21.6, 18.1)                            | 1.01 (0.98, 1.04)                             | 0.9 (-2.4, 4.2)                               |
| Quartile 3            | 1.00 (0.79, 1.27)                             | 0.0 (-21.2, 26.9)                             | 1.01 (0.98, 1.05)                             | 1.2 (-2.6, 5.1)                               |
| Quartile 4            | 1.04 (0.84, 1.30)                             | 4.3 (-16.5, 30.1)                             | 0.99 (0.96, 1.03)                             | -0.7 (-4.0, 2.6)                              |

<sup>a</sup> Adjusted for maternal age, parental socio-occupational status, pre-pregnancy BMI, parity, maternal smoking, birth year, fish intake, geographical residence, and alcohol intake during pregnancy. Study sample (1, 2, 3) was included in the model for continuous exposure and study-specific distribution was used to define PFAS quartiles.

<sup>b</sup> Relative % difference was calculated as  $\exp(\beta)$ . Absolute % difference was calculated as  $(\exp(\beta)-1)\times 100\%$ .

**Table S6. Association between maternal thyroid hormones and PFAS levels in multiple PFAS models.**

| A) TSH (mIU/L)                        |                                             |                                             |                                |                                |                                |                                |
|---------------------------------------|---------------------------------------------|---------------------------------------------|--------------------------------|--------------------------------|--------------------------------|--------------------------------|
| Per IQR increase of each PFAS (ng/ml) | Model 1 <sup>a</sup>                        |                                             | Model 2 <sup>b</sup>           |                                | Model 3 <sup>c</sup>           |                                |
|                                       | Relative % difference (95% CI) <sup>d</sup> | Absolute % Difference (95% CI) <sup>d</sup> | Relative % difference (95% CI) | Absolute % Difference (95% CI) | Relative % difference (95% CI) | Absolute % Difference (95% CI) |
| PFOS                                  | 1.04 (0.96, 1.14)                           | 4.3 (-4.3, 13.8)                            | 1.04 (0.94, 1.15)              | 3.9 (-6.5, 15.4)               | 1.03 (0.89, 1.18)              | 2.6 (-10.7, 17.9)              |
| PFOA                                  | NA                                          | NA                                          | 0.99 (0.91, 1.08)              | -1.0 (-9.3, 8.1)               | 1.00 (0.86, 1.16)              | -0.4 (-14.4, 15.9)             |
| PFHxS                                 | NA                                          | NA                                          | NA                             | NA                             | 1.01 (0.95, 1.09)              | 1.5 (-5.3, 8.7)                |
| PFNA                                  | NA                                          | NA                                          | NA                             | NA                             | NA                             | NA                             |
| PFHpS                                 | NA                                          | NA                                          | NA                             | NA                             | NA                             | NA                             |
| PFDA                                  | NA                                          | NA                                          | NA                             | NA                             | NA                             | NA                             |
| Per IQR increase of each PFAS (ng/ml) | Model 4 <sup>d</sup>                        |                                             | Model 5 <sup>e</sup>           |                                | Model 6 <sup>f</sup>           |                                |
|                                       | Relative % difference (95% CI)              | Absolute % Difference (95% CI)              | Relative % difference (95% CI) | Absolute % Difference (95% CI) | Relative % difference (95% CI) | Absolute % Difference (95% CI) |
| PFOS                                  | 1.03 (0.89, 1.19)                           | 2.8 (-10.9, 18.6)                           | 1.06 (0.82, 1.37)              | 6.1 (-17.6, 36.8)              | 1.09 (0.85, 1.39)              | 8.5 (-15.0, 38.6)              |
| PFOA                                  | 1.00 (0.86, 1.16)                           | -0.2 (-14.3, 16.2)                          | 1.00 (0.86, 1.17)              | 0.0 (-14.3, 16.7)              | 0.98 (0.84, 1.14)              | -2.1 (-16.1, 14.3)             |
| PFHxS                                 | 1.02 (0.95, 1.09)                           | 1.5 (-5.2, 8.7)                             | 1.02 (0.96, 1.09)              | 1.9 (-4.4, 8.6)                | 1.02 (0.96, 1.08)              | 1.8 (-4.4, 8.5)                |
| PFNA                                  | 1.00 (0.93, 1.07)                           | -0.4 (-7.0, 6.6)                            | 1.00 (0.93, 1.06)              | -0.2 (-6.5, 6.5)               | 1.04 (0.95, 1.15)              | 4.2 (-5.4, 14.7)               |
| PFHpS                                 | NA                                          | NA                                          | 0.96 (0.77, 1.20)              | -3.7 (-22.7, 20.1)             | 0.96 (0.77, 1.20)              | -3.8 (-22.7, 19.7)             |
| PFDA                                  | NA                                          | NA                                          | NA                             | NA                             | 0.94 (0.86, 1.03)              | -6.1 (-14.5, 3.0)              |
| B) fT4 (pmol/L)                       |                                             |                                             |                                |                                |                                |                                |
| Per IQR increase of each PFAS (ng/ml) | Model 1 <sup>a</sup>                        |                                             | Model 2 <sup>b</sup>           |                                | Model 3 <sup>c</sup>           |                                |
|                                       | Relative % difference (95% CI)              | Absolute % Difference (95% CI)              | Relative % difference (95% CI) | Absolute % Difference (95% CI) | Relative % difference (95% CI) | Absolute % Difference (95% CI) |
| PFOS                                  | 1.00 (0.99, 1.02)                           | 0.4 (-1.0, 1.8)                             | 1.00 (0.98, 1.02)              | 0.1 (-1.8, 1.9)                | 1.00 (0.98, 1.03)              | 0.3 (-2.3, 2.9)                |
| PFOA                                  | NA                                          | NA                                          | 1.01 (0.99, 1.02)              | 0.6 (-1.0, 2.2)                | 1.00 (0.97, 1.03)              | 0.0 (-3, 3.2)                  |
| PFHxS                                 | NA                                          | NA                                          | NA                             | NA                             | 1.00 (0.98, 1.01)              | -0.4 (-1.8, 1)                 |
| PFNA                                  | NA                                          | NA                                          | NA                             | NA                             | NA                             | NA                             |
| PFHpS                                 | NA                                          | NA                                          | NA                             | NA                             | NA                             | NA                             |
| PFDA                                  | NA                                          | NA                                          | NA                             | NA                             | NA                             | NA                             |
| Per IQR increase of each PFAS (ng/ml) | Model 4 <sup>d</sup>                        |                                             | Model 5 <sup>e</sup>           |                                | Model 6 <sup>f</sup>           |                                |
|                                       | Relative % difference (95% CI)              | Absolute % Difference (95% CI)              | Relative % difference (95% CI) | Absolute % Difference (95% CI) | Relative % difference (95% CI) | Absolute % Difference (95% CI) |
| PFOS                                  | 1.00 (0.98, 1.03)                           | 0.3 (-2.3, 3.1)                             | 1.00 (0.96, 1.04)              | -0.3 (-4.4, 3.9)               | 0.99 (0.95, 1.03)              | -1.0 (-5.0, 3.1)               |
| PFOA                                  | 1.00 (0.97, 1.03)                           | 0.1 (-2.9, 3.2)                             | 1.00 (0.97, 1.03)              | 0.0 (-3.0, 3.2)                | 1.01 (0.98, 1.04)              | 0.7 (-2.4, 3.9)                |
| PFHxS                                 | 1.00 (0.98, 1.01)                           | -0.4 (-1.8, 1.1)                            | 1.00 (0.98, 1.01)              | -0.4 (-1.8, 1.0)               | 1.00 (0.98, 1.01)              | -0.4 (-1.8, 1.0)               |
| PFNA                                  | 1.00 (0.99, 1.01)                           | -0.1 (-1.4, 1.1)                            | 1.00 (0.99, 1.01)              | -0.2 (-1.5, 1.1)               | 0.98 (0.97, 1.00)              | -1.5 (-3.1, 0.1)               |
| PFHpS                                 | NA                                          | NA                                          | 1.01 (0.97, 1.05)              | 0.8 (-2.9, 4.6)                | 1.01 (0.97, 1.05)              | 0.8 (-2.8, 4.5)                |
| PFDA                                  | NA                                          | NA                                          | NA                             | NA                             | 1.02 (1.00, 1.04)              | 2.0 (0.2, 3.7)                 |

<sup>a</sup> Model included maternal age, parental socio-occupational status, BMI, parity, maternal smoking, birth year, an indicator of study sample as covariate, and adjusted for PFOS.

<sup>b</sup> Included all covariate in model 1 and co-adjusted for PFOS, and PFOA in the same model.

<sup>c</sup> Included all covariate in model 1 and co-adjusted for PFOS, PFOA, and PFHxS in the same model.

<sup>d</sup> Included all covariate in model 1 and co-adjusted for PFOS, PFOA, PFHxS, and PFNA in the same model.

<sup>e</sup> Included all covariate in model 1 and co-adjusted for PFOS, PFOA, PFHxS, PFNA, and PFHpS in the same model.

<sup>f</sup> Included all covariate in model 1 and co-adjusted for PFOS, PFOA, PFHxS, PFNA, PFHpS and PFDA in the same model.

<sup>d</sup> Relative % difference was calculated as  $\exp(\beta)$ . Absolute % difference was calculated as  $(\exp(\beta)-1) \times 100\%$ .



**Table S7. Association between maternal thyroid hormones and PFAS levels (ng/ml) stratified by socio-economic status, parity, smoking, birth year, and geographical residence, maternal age, and alcohol intake.**

|                         | TSH (mIU/L)                                   |                                        |                                       | fT4 (pmol/L)                                  |                                        |                                       |
|-------------------------|-----------------------------------------------|----------------------------------------|---------------------------------------|-----------------------------------------------|----------------------------------------|---------------------------------------|
|                         | Relative % difference (95% CI) <sup>a,b</sup> |                                        |                                       | Relative % difference (95% CI) <sup>a,b</sup> |                                        |                                       |
|                         | Low socio-occupational status (N=425)         | High socio-occupational status (N=941) | <i>P</i> for interaction <sup>c</sup> | Low socio-occupational status (N=425)         | High socio-occupational status (N=941) | <i>P</i> for interaction <sup>c</sup> |
| <b>PFOS<sup>b</sup></b> | 0.96 (0.81, 1.14)                             | 1.06 (0.97, 1.17)                      | 0.32                                  | 1.01 (0.99, 1.03)                             | 1.00 (0.98, 1.01)                      | 0.47                                  |
| <b>PFOA</b>             | 0.99 (0.85, 1.15)                             | 1.01 (0.92, 1.11)                      | 0.85                                  | 1.01 (0.98, 1.04)                             | 1.00 (0.99, 1.01)                      | 0.47                                  |
| <b>PFHxS</b>            | 1.01 (0.86, 1.18)                             | 1.03 (0.97, 1.09)                      | 0.56                                  | 1.01 (0.98, 1.03)                             | 0.99 (0.98, 1.01)                      | 0.21                                  |
| <b>PFNA</b>             | 0.95 (0.84, 1.08)                             | 1.06 (1.00, 1.13)                      | 0.11                                  | 1.01 (0.99, 1.03)                             | 0.99 (0.98, 1.01)                      | 0.29                                  |
| <b>PFHpS</b>            | 0.89 (0.74, 1.07)                             | 1.08 (0.98, 1.19)                      | 0.09                                  | 1.01 (0.99, 1.04)                             | 0.99 (0.97, 1.01)                      | 0.13                                  |
| <b>PFDA</b>             | 0.98 (0.79, 1.22)                             | 1.01 (0.96, 1.06)                      | 0.45                                  | 1.01 (0.98, 1.04)                             | 1.01 (1.00, 1.02)                      | 0.80                                  |

  

|              | Nulliparous (N=712) | Multiparous (N=648) | <i>P</i> for interaction | Nulliparous (N=712) | Multiparous (N=648) | <i>P</i> for interaction |
|--------------|---------------------|---------------------|--------------------------|---------------------|---------------------|--------------------------|
|              | <b>PFOS</b>         | 1.02 (0.92, 1.13)   | 1.04 (0.90, 1.20)        | 0.99                | 1.00 (0.99, 1.02)   | 1.01 (0.99, 1.03)        |
| <b>PFOA</b>  | 0.99 (0.91, 1.07)   | 1.03 (0.86, 1.23)   | 0.66                     | 1.00 (0.99, 1.02)   | 1.02 (0.99, 1.04)   | 0.52                     |
| <b>PFHxS</b> | 1.05 (1.00, 1.11)   | 0.89 (0.76, 1.05)   | 0.07                     | 0.99 (0.98, 1.00)   | 1.03 (1.00, 1.06)   | 0.01                     |
| <b>PFNA</b>  | 1.05 (0.97, 1.13)   | 0.97 (0.88, 1.06)   | 0.41                     | 1.00 (0.98, 1.01)   | 1.00 (0.99, 1.02)   | 0.57                     |
| <b>PFHpS</b> | 1.06 (0.95, 1.19)   | 0.98 (0.85, 1.12)   | 0.33                     | 0.99 (0.98, 1.01)   | 1.02 (0.99, 1.04)   | 0.12                     |
| <b>PFDA</b>  | 1.01 (0.93, 1.10)   | 0.95 (0.86, 1.04)   | 0.30                     | 1.01 (0.99, 1.03)   | 1.01 (0.99, 1.03)   | 0.77                     |

  

|              | Smoker (N=444)    | Non-Smoker (N=922) | <i>P</i> for interaction | Smoker (N=444)    | Non-Smoker (N=922) | <i>P</i> for interaction |
|--------------|-------------------|--------------------|--------------------------|-------------------|--------------------|--------------------------|
|              | <b>PFOS</b>       | 1.04 (0.91, 1.19)  | 1.03 (0.92, 1.15)        | 0.70              | 1.02 (0.99, 1.04)  | 1.00 (0.98, 1.02)        |
| <b>PFOA</b>  | 1.10 (0.95, 1.26) | 0.98 (0.90, 1.07)  | 0.61                     | 1.00 (0.98, 1.03) | 1.01 (0.99, 1.02)  | 0.76                     |
| <b>PFHxS</b> | 1.06 (0.98, 1.14) | 1.02 (0.94, 1.10)  | 0.79                     | 1.00 (0.98, 1.01) | 1.00 (0.98, 1.01)  | 0.89                     |
| <b>PFNA</b>  | 1.11 (0.97, 1.26) | 0.98 (0.91, 1.05)  | 0.39                     | 1.00 (0.98, 1.03) | 1.00 (0.99, 1.01)  | 0.81                     |
| <b>PFHpS</b> | 1.12 (0.94, 1.34) | 0.98 (0.88, 1.10)  | 0.84                     | 1.01 (0.98, 1.03) | 1.00 (0.98, 1.02)  | 0.58                     |
| <b>PFDA</b>  | 0.99 (0.90, 1.08) | 0.98 (0.91, 1.06)  | 0.82                     | 1.02 (1.00, 1.05) | 1.00 (0.99, 1.02)  | 0.15                     |

  

|              | Birth year < 2000 (N=402) | Birth year ≥ 2000 (N=964) | <i>P</i> for interaction | Birth year < 2000 (N=402) | Birth year ≥ 2000 (N=964) | <i>P</i> for interaction |
|--------------|---------------------------|---------------------------|--------------------------|---------------------------|---------------------------|--------------------------|
|              | <b>PFOS</b>               | 1.13 (0.91, 1.40)         | 1.03 (0.93, 1.13)        | 0.54                      | 1.00 (0.97, 1.03)         | 1.00 (0.99, 1.02)        |
| <b>PFOA</b>  | 1.20 (0.97, 1.48)         | 0.98 (0.91, 1.07)         | 0.23                     | 1.01 (0.98, 1.04)         | 1.00 (0.99, 1.02)         | 0.65                     |
| <b>PFHxS</b> | 0.95 (0.77, 1.16)         | 1.03 (0.96, 1.10)         | 0.73                     | 1.02 (0.99, 1.05)         | 0.99 (0.98, 1.01)         | 0.19                     |
| <b>PFNA</b>  | 0.97 (0.80, 1.19)         | 1.03 (0.97, 1.10)         | 0.48                     | 1.00 (0.98, 1.03)         | 1.00 (0.98, 1.01)         | 0.60                     |
| <b>PFHpS</b> | 1.07 (0.89, 1.28)         | 1.03 (0.92, 1.14)         | 0.60                     | 1.01 (0.98, 1.03)         | 1.00 (0.98, 1.02)         | 0.85                     |
| <b>PFDA</b>  | 1.06 (0.82, 1.35)         | 0.98 (0.92, 1.05)         | 0.80                     | 0.99 (0.96, 1.02)         | 1.01 (1.00, 1.02)         | 0.63                     |

  

|              | East (N=484)      | West (N=882)      | <i>P</i> for interaction | East (N=484)      | West (N=882)      | <i>P</i> for interaction |
|--------------|-------------------|-------------------|--------------------------|-------------------|-------------------|--------------------------|
|              | <b>PFOS</b>       | 1.12 (0.94, 1.33) | 0.98 (0.89, 1.08)        | 0.33              | 1.01 (0.98, 1.04) | 1.00 (0.99, 1.02)        |
| <b>PFOA</b>  | 1.13 (0.92, 1.38) | 0.97 (0.91, 1.05) | 0.26                     | 1.01 (0.97, 1.04) | 1.00 (0.99, 1.02) | 0.83                     |
| <b>PFHxS</b> | 1.04 (0.94, 1.15) | 1.01 (0.93, 1.09) | 0.29                     | 0.99 (0.97, 1.01) | 1.00 (0.99, 1.02) | 0.17                     |
| <b>PFNA</b>  | 1.07 (0.90, 1.26) | 1.00 (0.93, 1.06) | 0.59                     | 1.00 (0.98, 1.02) | 1.00 (0.99, 1.01) | 0.67                     |
| <b>PFHpS</b> | 1.06 (0.89, 1.27) | 1.00 (0.90, 1.10) | 0.51                     | 1.00 (0.97, 1.03) | 1.00 (0.99, 1.02) | 0.90                     |
| <b>PFDA</b>  | 1.07 (0.87, 1.30) | 0.97 (0.92, 1.03) | 0.77                     | 1.00 (0.98, 1.03) | 1.01 (1.00, 1.02) | 0.94                     |

  

|              | Maternal age <30 (N=607) | Maternal age ≥30 (N=759) | <i>P</i> for interaction | Maternal age <30 (N=607) | Maternal age ≥30 (N=759) | <i>P</i> for interaction |
|--------------|--------------------------|--------------------------|--------------------------|--------------------------|--------------------------|--------------------------|
|              | <b>PFOS</b>              | 1.09 (0.96, 1.23)        | 0.99 (0.89, 1.10)        | 0.28                     | 1.00 (0.98, 1.02)        | 1.01 (0.99, 1.03)        |
| <b>PFOA</b>  | 1.02 (0.91, 1.14)        | 0.96 (0.84, 1.09)        | 0.46                     | 1.00 (0.99, 1.02)        | 1.01 (0.99, 1.04)        | 0.89                     |
| <b>PFHxS</b> | 1.03 (0.95, 1.12)        | 1.02 (0.96, 1.09)        | 0.63                     | 0.99 (0.98, 1.01)        | 1.00 (0.99, 1.01)        | 0.51                     |

|              |                   |                   |      |                   |                   |      |
|--------------|-------------------|-------------------|------|-------------------|-------------------|------|
| <b>PFNA</b>  | 1.00 (0.89, 1.13) | 1.02 (0.96, 1.09) | 0.78 | 1.01 (0.99, 1.03) | 1.00 (0.98, 1.01) | 0.72 |
| <b>PFHpS</b> | 1.05 (0.92, 1.20) | 1.00 (0.90, 1.12) | 0.41 | 1.00 (0.98, 1.02) | 1.01 (0.99, 1.03) | 0.40 |
| <b>PFDA</b>  | 0.98 (0.88, 1.09) | 0.99 (0.93, 1.05) | 0.82 | 1.02 (0.99, 1.04) | 1.00 (0.99, 1.01) | 0.70 |

|              | Alcohol intake in pregnancy<br>(N=1144) | No alcohol intake in pregnancy<br>(N=222) | <i>P for interaction</i> | Alcohol intake in pregnancy<br>(N=1144) | No alcohol intake in pregnancy<br>(N=222) | <i>P for interaction</i> |
|--------------|-----------------------------------------|-------------------------------------------|--------------------------|-----------------------------------------|-------------------------------------------|--------------------------|
| <b>PFOS</b>  | 1.03 (0.94, 1.12)                       | 1.12 (0.92, 1.35)                         | 0.82                     | 1.00 (0.99, 1.02)                       | 1.00 (0.97, 1.03)                         | 0.61                     |
| <b>PFOA</b>  | 0.99 (0.92, 1.06)                       | 1.14 (0.89, 1.47)                         | 0.93                     | 1.01 (1.00, 1.02)                       | 1.00 (0.96, 1.04)                         | 0.41                     |
| <b>PFHxS</b> | 0.99 (0.94, 1.04)                       | 1.02 (0.90, 1.17)                         | 0.81                     | 1.00 (0.99, 1.01)                       | 0.99 (0.97, 1.02)                         | 0.91                     |
| <b>PFNA</b>  | 1.03 (0.97, 1.10)                       | 0.98 (0.85, 1.13)                         | 0.46                     | 0.99 (0.98, 1.00)                       | 1.01 (1.00, 1.03)                         | 0.04                     |
| <b>PFHpS</b> | 1.00 (0.92, 1.10)                       | 1.09 (0.89, 1.35)                         | 0.77                     | 1.00 (0.99, 1.02)                       | 1.00 (0.97, 1.04)                         | 0.49                     |
| <b>PFDA</b>  | 0.97 (0.92, 1.03)                       | 0.98 (0.86, 1.12)                         | 0.96                     | 1.00 (0.99, 1.02)                       | 1.02 (1.00, 1.04)                         | 0.33                     |

<sup>a</sup> Relative % difference in thyroid hormones was calculated per interquartile range (IQR) increase in continuous variables.

<sup>b</sup> Adjusted for maternal age, parental socio-occupational status, BMI, parity, maternal smoking, birth year, and an indicator of study sample.

<sup>c</sup> Tests of heterogeneity were also performed by assessing the p-value of the interaction term for each PFAS and potential modifying factors in the regression models

**Table S8. Estimated maternal TSH and ft4 levels in each gestational week according to high or low PFAS exposure**

| Gestational week | TSH (mIU/L)                |                         |                         | ft4 (pmol/L)               |                         |                         |
|------------------|----------------------------|-------------------------|-------------------------|----------------------------|-------------------------|-------------------------|
|                  | PFAS $\leq 75^{\text{th}}$ | PFAS $> 75^{\text{th}}$ | Difference <sup>a</sup> | PFAS $\leq 75^{\text{th}}$ | PFAS $> 75^{\text{th}}$ | Difference <sup>a</sup> |
| <b>a) PFOS</b>   | N=1024                     | N=342                   |                         | N=1024                     | N=342                   |                         |
| 5-6              | 1.44 (1.15, 1.74)          | 1.61 (1.33, 1.88)       | +0.17                   | 14.5 (14.1, 15.0)          | 14.0 (13.4, 14.6)       | -0.5                    |
| 7                | 1.16 (1.03, 1.29)          | 1.31 (1.12, 1.49)       | +0.15                   | 14.5 (14.2, 14.7)          | 14.2 (13.8, 14.6)       | -0.3                    |
| 8                | 1.00 (0.88, 1.12)          | 1.14 (0.93, 1.36)       | +0.14                   | 14.4 (14.1, 14.6)          | 14.3 (14.0, 14.7)       | -0.1                    |
| 9                | 0.93 (0.80, 1.06)          | 1.07 (0.85, 1.29)       | +0.14                   | 14.2 (14.0, 14.5)          | 14.4 (14.0, 14.8)       | +0.2                    |
| 10               | 0.94 (0.81, 1.06)          | 1.08 (0.88, 1.29)       | +0.14                   | 14.1 (13.8, 14.3)          | 14.3 (13.9, 14.7)       | +0.2                    |
| 11               | 1.01 (0.88, 1.14)          | 1.17 (0.96, 1.39)       | +0.16                   | 13.8 (13.6, 14.1)          | 14.1 (13.6, 14.6)       | +0.3                    |
| 12-19            | 1.18 (0.95, 1.41)          | 1.37 (0.98, 1.75)       | +0.19                   | 13.5 (13.1, 14.0)          | 13.8 (13.0, 14.6)       | +0.3                    |
| <b>b) PFOA</b>   | N=1024                     | N=342                   |                         | N=1024                     | N=342                   |                         |
| 5-6              | 1.44 (1.14, 1.75)          | 1.60 (1.35, 1.85)       | +0.16                   | 14.4 (14.0, 14.9)          | 14.3 (13.8, 14.7)       | -0.1                    |
| 7                | 1.15 (1.01, 1.29)          | 1.34 (1.18, 1.50)       | +0.19                   | 14.4 (14.2, 14.7)          | 14.4 (14.1, 14.7)       | $\pm 0.0$               |
| 8                | 0.99 (0.87, 1.11)          | 1.18 (0.96, 1.40)       | +0.19                   | 14.3 (14.1, 14.6)          | 14.5 (14.1, 14.8)       | +0.2                    |
| 9                | 0.93 (0.80, 1.06)          | 1.09 (0.85, 1.33)       | +0.16                   | 14.2 (14.0, 14.5)          | 14.4 (14.0, 14.8)       | +0.2                    |
| 10               | 0.95 (0.82, 1.07)          | 1.05 (0.83, 1.28)       | +0.10                   | 14.1 (13.8, 14.3)          | 14.3 (13.9, 14.7)       | +0.2                    |
| 11               | 1.04 (0.92, 1.17)          | 1.07 (0.84, 1.30)       | +0.03                   | 13.9 (13.6, 14.1)          | 14.0 (13.5, 14.5)       | +0.1                    |
| 12-19            | 1.24 (1.01, 1.48)          | 1.13 (0.77, 1.49)       | -0.11                   | 13.6 (13.2, 14.1)          | 13.6 (12.9, 14.4)       | $\pm 0.0$               |
| <b>c) PFHxS</b>  | N=883                      | N=295                   |                         | N=883                      | N=295                   |                         |
| 5-6              | 1.46 (1.11, 1.82)          | 1.60 (1.30, 1.90)       | +0.14                   | 14.2 (13.7, 14.7)          | 14.6 (14.0, 15.2)       | +0.4                    |
| 7                | 1.17 (1.01, 1.33)          | 1.32 (1.15, 1.49)       | +0.15                   | 14.3 (14.0, 14.5)          | 14.7 (14.3, 15.0)       | +0.4                    |
| 8                | 1.01 (0.87, 1.14)          | 1.14 (0.93, 1.35)       | +0.13                   | 14.2 (14.0, 14.5)          | 14.6 (14.2, 15.0)       | +0.4                    |
| 9                | 0.94 (0.79, 1.08)          | 1.04 (0.82, 1.26)       | +0.10                   | 14.2 (13.9, 14.5)          | 14.5 (14.0, 14.9)       | +0.3                    |
| 10               | 0.94 (0.80, 1.08)          | 0.99 (0.78, 1.21)       | +0.05                   | 14.0 (13.8, 14.3)          | 14.3 (13.8, 14.8)       | +0.3                    |
| 11               | 1.02 (0.88, 1.16)          | 1.00 (0.77, 1.23)       | -0.02                   | 13.8 (13.6, 14.1)          | 13.9 (13.3, 14.6)       | +0.1                    |
| 12-19            | 1.20 (0.95, 1.45)          | 1.05 (0.68, 1.42)       | -0.15                   | 13.6 (13.1, 14.0)          | 13.6 (12.5, 14.6)       | $\pm 0.0$               |
| <b>d) PFNA</b>   | N=883                      | N=295                   |                         | N=883                      | N=295                   |                         |
| 5-6              | 1.52 (1.14, 1.90)          | 1.47 (1.27, 1.66)       | -0.05                   | 14.3 (13.8, 14.8)          | 14.4 (13.8, 15.0)       | +0.1                    |
| 7                | 1.18 (1.02, 1.34)          | 1.28 (1.12, 1.45)       | +0.10                   | 14.4 (14.1, 14.7)          | 14.3 (14.0, 14.7)       | -0.1                    |
| 8                | 1.00 (0.86, 1.14)          | 1.15 (0.93, 1.37)       | +0.15                   | 14.4 (14.1, 14.6)          | 14.2 (13.9, 14.6)       | -0.2                    |
| 9                | 0.93 (0.78, 1.08)          | 1.06 (0.83, 1.29)       | +0.13                   | 14.3 (14.0, 14.6)          | 14.2 (13.8, 14.6)       | -0.1                    |
| 10               | 0.94 (0.79, 1.08)          | 1.00 (0.80, 1.19)       | +0.06                   | 14.1 (13.8, 14.4)          | 14.2 (13.7, 14.6)       | +0.1                    |
| 11               | 1.03 (0.89, 1.17)          | 0.96 (0.79, 1.13)       | -0.07                   | 13.8 (13.5, 14.1)          | 14.2 (13.7, 14.6)       | +0.4                    |
| 12-19            | 1.24 (0.98, 1.50)          | 0.95 (0.71, 1.19)       | -0.29                   | 13.5 (13.0, 13.9)          | 14.2 (13.5, 14.8)       | +0.7                    |
| <b>e) PFHpS</b>  | N=884                      | N=294                   |                         | N=884                      | N=294                   |                         |
| 5-6              | 1.45 (1.09, 1.80)          | 1.68 (1.34, 2.01)       | +0.23                   | 14.5 (14.0, 15.0)          | 13.8 (13.2, 14.5)       | -0.7                    |
| 7                | 1.14 (0.99, 1.29)          | 1.39 (1.20, 1.59)       | +0.25                   | 14.4 (14.2, 14.7)          | 14.1 (13.7, 14.5)       | -0.3                    |
| 8                | 0.97 (0.83, 1.11)          | 1.21 (0.99, 1.43)       | +0.24                   | 14.4 (14.1, 14.6)          | 14.3 (13.9, 14.7)       | -0.1                    |
| 9                | 0.90 (0.76, 1.05)          | 1.11 (0.88, 1.34)       | +0.21                   | 14.2 (13.9, 14.5)          | 14.3 (13.9, 14.8)       | +0.1                    |
| 10               | 0.92 (0.78, 1.06)          | 1.06 (0.85, 1.27)       | +0.14                   | 14.0 (13.7, 14.3)          | 14.3 (13.8, 14.7)       | +0.3                    |
| 11               | 1.01 (0.87, 1.15)          | 1.06 (0.85, 1.28)       | +0.05                   | 13.8 (13.5, 14.1)          | 14.1 (13.6, 14.5)       | +0.3                    |
| 12-19            | 1.21 (0.94, 1.48)          | 1.12 (0.77, 1.46)       | -0.09                   | 13.5 (13.0, 14.0)          | 13.8 (13.0, 14.5)       | +0.3                    |
| <b>f) PFDA</b>   | N=883                      | N=295                   |                         | N=883                      | N=295                   |                         |
| 5-6              | 1.49 (1.12, 1.85)          | 1.54 (1.26, 1.83)       | +0.05                   | 14.5 (14.0, 15.0)          | 13.9 (13.4, 14.5)       | -0.6                    |
| 7                | 1.16 (1.00, 1.31)          | 1.34 (1.13, 1.55)       | +0.18                   | 14.5 (14.2, 14.7)          | 14.1 (13.8, 14.5)       | -0.4                    |
| 8                | 0.99 (0.86, 1.12)          | 1.18 (0.94, 1.43)       | +0.19                   | 14.4 (14.1, 14.6)          | 14.2 (13.8, 14.6)       | -0.2                    |
| 9                | 0.93 (0.78, 1.08)          | 1.05 (0.81, 1.29)       | +0.12                   | 14.2 (13.9, 14.5)          | 14.3 (13.9, 14.8)       | +0.1                    |
| 10               | 0.96 (0.82, 1.11)          | 0.95 (0.75, 1.15)       | -0.01                   | 14.0 (13.7, 14.3)          | 14.3 (13.9, 14.8)       | +0.3                    |
| 11               | 1.10 (0.95, 1.25)          | 0.87 (0.71, 1.03)       | -0.23                   | 13.7 (13.4, 14.0)          | 14.3 (13.9, 14.7)       | +0.6                    |
| 12-19            | 1.37 (1.09, 1.66)          | 0.80 (0.60, 1.01)       | -0.57                   | 13.3 (12.8, 13.8)          | 14.2 (13.6, 14.8)       | +0.9                    |

<sup>a</sup> We estimated the expected TSH and fT4 value for each gestational week comparing the top PFAS quartile to the lower three quartiles adjusting for maternal age, socio-occupational status, BMI, parity, smoke, and birth year. Study-specific distribution was used to define PFAS quartiles. The model also included the interaction terms between PFAS (binary) and gestational week (continuous value and a square term). Mean difference was calculated as the expected mean among the top PFAS quartile minus the expected mean among the lower three quartiles. Data is shown in Figure 2.

**Table S9. Association between maternal thyroid hormones and binary PFAS variables (>75<sup>th</sup> vs. ≤75<sup>th</sup> as reference) according to gestational week (<10, ≥10).**

|              | TSH (mIU/L)                                   |                              |                          | fT4 (pmol/L)                                  |                              |                          |
|--------------|-----------------------------------------------|------------------------------|--------------------------|-----------------------------------------------|------------------------------|--------------------------|
|              | Relative % difference (95% CI) <sup>a,b</sup> |                              |                          | Relative % difference (95% CI) <sup>a,b</sup> |                              |                          |
|              | Gestational week <10 (N=1001)                 | Gestational week ≥10 (N=365) | <i>P for interaction</i> | Gestational week <10 (N=1001)                 | Gestational week ≥10 (N=365) | <i>P for interaction</i> |
| <b>PFOS</b>  | 1.11 (0.93, 1.31)                             | 1.02 (0.78, 1.32)            | 0.45                     | 0.98 (0.96, 1.01)                             | 1.02 (0.98, 1.07)            | 0.16                     |
| <b>PFOA</b>  | 1.14 (0.96, 1.36)                             | 0.92 (0.72, 1.17)            | 0.15                     | 1.00 (0.97, 1.03)                             | 1.02 (0.97, 1.06)            | 0.66                     |
| <b>PFHxS</b> | 1.14 (0.95, 1.36)                             | 0.95 (0.72, 1.26)            | 0.18                     | 1.03 (1.00, 1.06)                             | 1.01 (0.96, 1.07)            | 0.84                     |
| <b>PFNA</b>  | 1.11 (0.92, 1.33)                             | 0.81 (0.63, 1.04)            | 0.10                     | 0.99 (0.96, 1.02)                             | 1.02 (0.97, 1.06)            | 0.29                     |
| <b>PFHpS</b> | 1.12 (0.93, 1.36)                             | 0.96 (0.73, 1.27)            | 0.20                     | 0.98 (0.95, 1.02)                             | 1.02 (0.97, 1.07)            | 0.29                     |
| <b>PFDA</b>  | 1.22 (1.01, 1.47)                             | 0.72 (0.56, 0.93)            | 0.003                    | 0.97 (0.94, 1.00)                             | 1.04 (1.00, 1.08)            | 0.02                     |

<sup>a</sup> Adjusted for maternal age, parental socio-occupational status, BMI, parity, maternal smoking, birth year, and an indicator of study sample.

<sup>b</sup> Relative % difference in thyroid hormones were calculated comparing the three lower PFAS quartiles (reference) to the highest.

**Table S10. Gestational week-specific high or low thyroid hormones status according to plasma PFAS levels (ng/ml) among 1,061 women included in study sample 3.**

| Per inter-quartile range increase of each PFAS | Low TSH <sup>a</sup><br>N=105 | High TSH <sup>a</sup><br>N=109 | Low ft4 <sup>a</sup><br>N=119 | High ft4 <sup>a</sup><br>N=92 |
|------------------------------------------------|-------------------------------|--------------------------------|-------------------------------|-------------------------------|
|                                                | OR and 95% CI <sup>b</sup>    |                                |                               |                               |
| <b>PFOS</b>                                    | 1.16 (0.66, 2.04)             | 0.83 (0.47, 1.45)              | 0.87 (0.58, 1.31)             | 1.23 (0.78, 1.92)             |
| <b>PFOA</b>                                    | 0.75 (0.43, 1.32)             | 0.67 (0.31, 1.46)              | 1.01 (0.52, 1.96)             | 1.09 (0.70, 1.69)             |
| <b>PFHxS</b>                                   | 1.15 (0.89, 1.47)             | 1.14 (0.90, 1.45)              | 1.18 (0.94, 1.50)             | 1.13 (0.86, 1.49)             |
| <b>PFNA</b>                                    | 0.95 (0.69, 1.31)             | 0.74 (0.52, 1.05)              | 0.89 (0.65, 1.20)             | 1.07 (0.84, 1.37)             |
| <b>PFHpS</b>                                   | 1.28 (0.78, 2.13)             | 0.85 (0.54, 1.35)              | 0.85 (0.58, 1.26)             | 1.32 (0.85, 2.03)             |
| <b>PFDA</b>                                    | 1.05 (0.79, 1.40)             | 0.81 (0.59, 1.11)              | 0.81 (0.55, 1.19)             | 1.30 (0.97, 1.73)             |

<sup>a</sup> Low or high TSH and ft4 status were defined using the week-specific lowest 10<sup>th</sup> or highest 90<sup>th</sup> percentile.

<sup>b</sup> Adjusted for maternal age, parental socio-occupational status, BMI, parity, maternal smoking, and birth year.

**Table S11. Gestational week-specific high or low thyroid hormones status according to plasma PFAS levels (ng/ml) excluding women with thyroid diseases (n=1,329).**

| Per inter-quartile range increase of each PFAS | Low TSH <sup>a</sup><br>N=133 | High TSH <sup>a</sup><br>N=129 | Low ft4 <sup>a</sup><br>N=137 | High ft4 <sup>a</sup><br>N=127 |
|------------------------------------------------|-------------------------------|--------------------------------|-------------------------------|--------------------------------|
|                                                | OR and 95% CI <sup>b</sup>    |                                |                               |                                |
| <b>PFOS</b>                                    | 1.08 (0.70, 1.68)             | 0.79 (0.50, 1.23)              | 0.80 (0.55, 1.16)             | 1.14 (0.80, 1.63)              |
| <b>PFOA</b>                                    | 0.79 (0.53, 1.18)             | 0.68 (0.40, 1.18)              | 0.85 (0.48, 1.50)             | 1.07 (0.87, 1.31)              |
| <b>PFHxS</b>                                   | 1.13 (0.89, 1.44)             | 1.12 (0.88, 1.43)              | 1.19 (0.94, 1.49)             | 1.12 (0.87, 1.45)              |
| <b>PFNA</b>                                    | 0.92 (0.68, 1.25)             | 0.72 (0.50, 1.02)              | 0.90 (0.67, 1.20)             | 1.06 (0.84, 1.34)              |
| <b>PFHpS</b>                                   | 1.27 (0.80, 2.01)             | 0.81 (0.51, 1.27)              | 0.85 (0.58, 1.25)             | 1.21 (0.80, 1.84)              |
| <b>PFDA</b>                                    | 1.13 (0.89, 1.44)             | 0.78 (0.56, 1.07)              | 0.85 (0.59, 1.23)             | 1.29 (0.99, 1.68)              |

<sup>a</sup> Low or high TSH and ft4 status were defined using the week-specific lowest 10<sup>th</sup> or highest 90<sup>th</sup> percentile.

<sup>b</sup> Adjusted for maternal age, parental socio-occupational status, BMI, parity, maternal smoking, and birth year.

**Figure S1. The directed acyclic graph constructed for this study.**

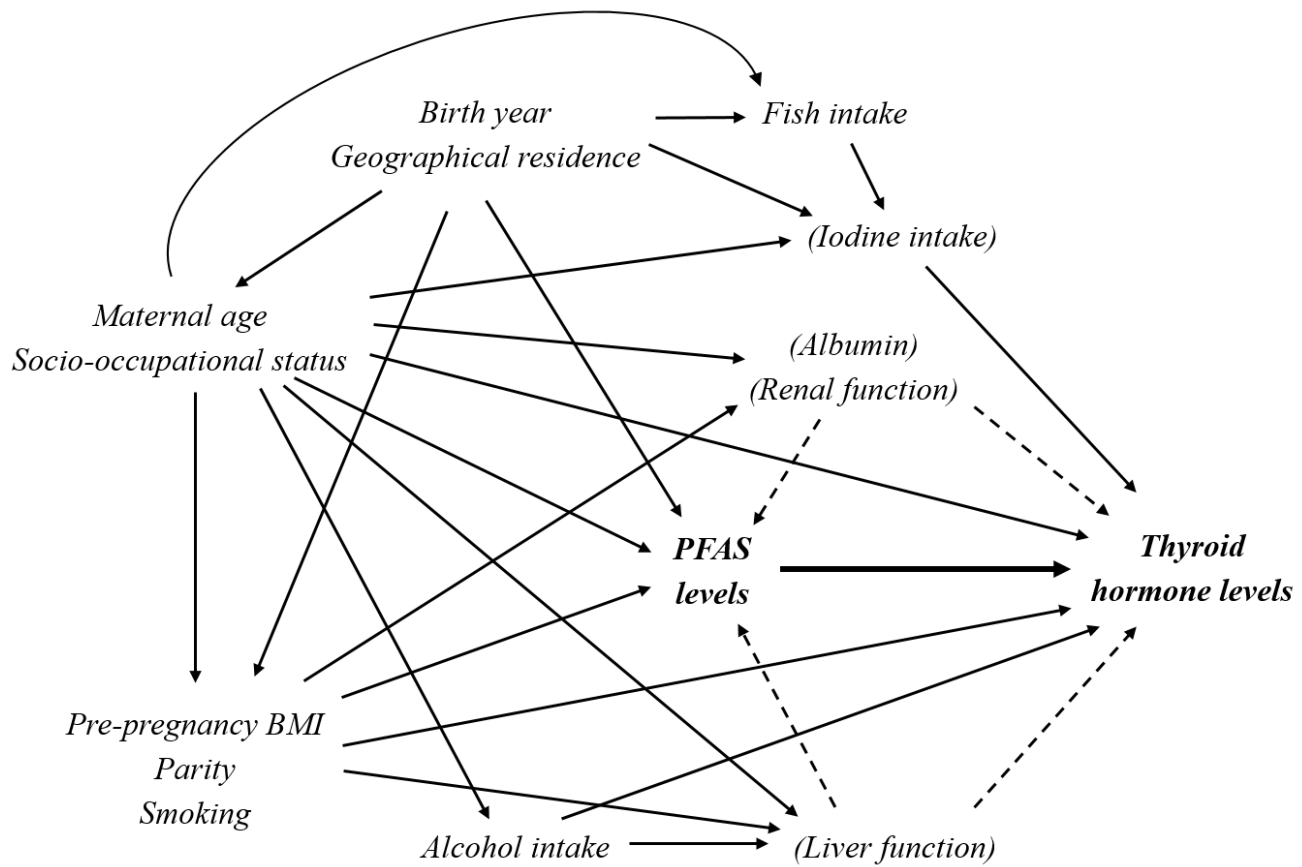

\*Variables with parenthesis (and dash arrows pointing to exposure and outcome) indicate potential unmeasured/uncontrolled confounders that should be evaluated for their potential impacts in future studies.



**Figure S2. Adjusted TSH and ft4 levels in each gestational week according to PFAS levels (the 1<sup>st</sup> quartile vs the 4<sup>th</sup> quartile).**

**A) TSH**

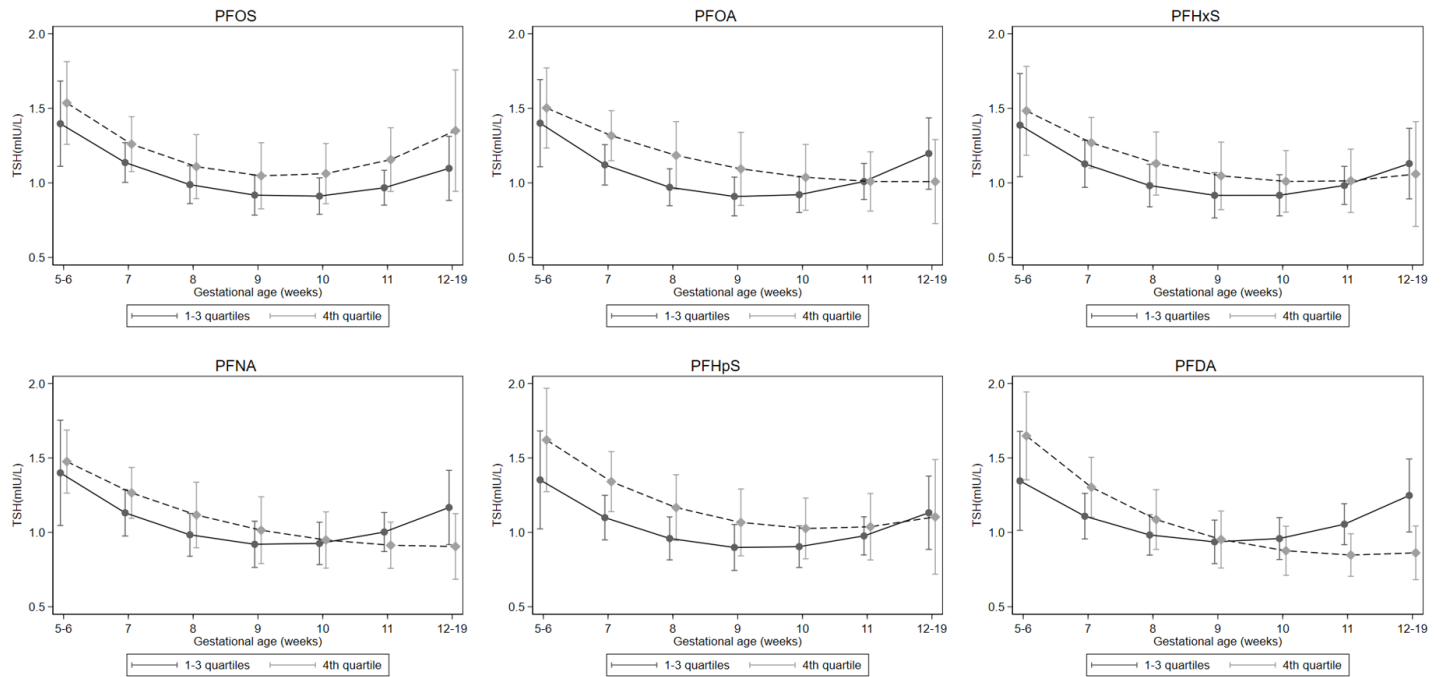

**B) ft4**

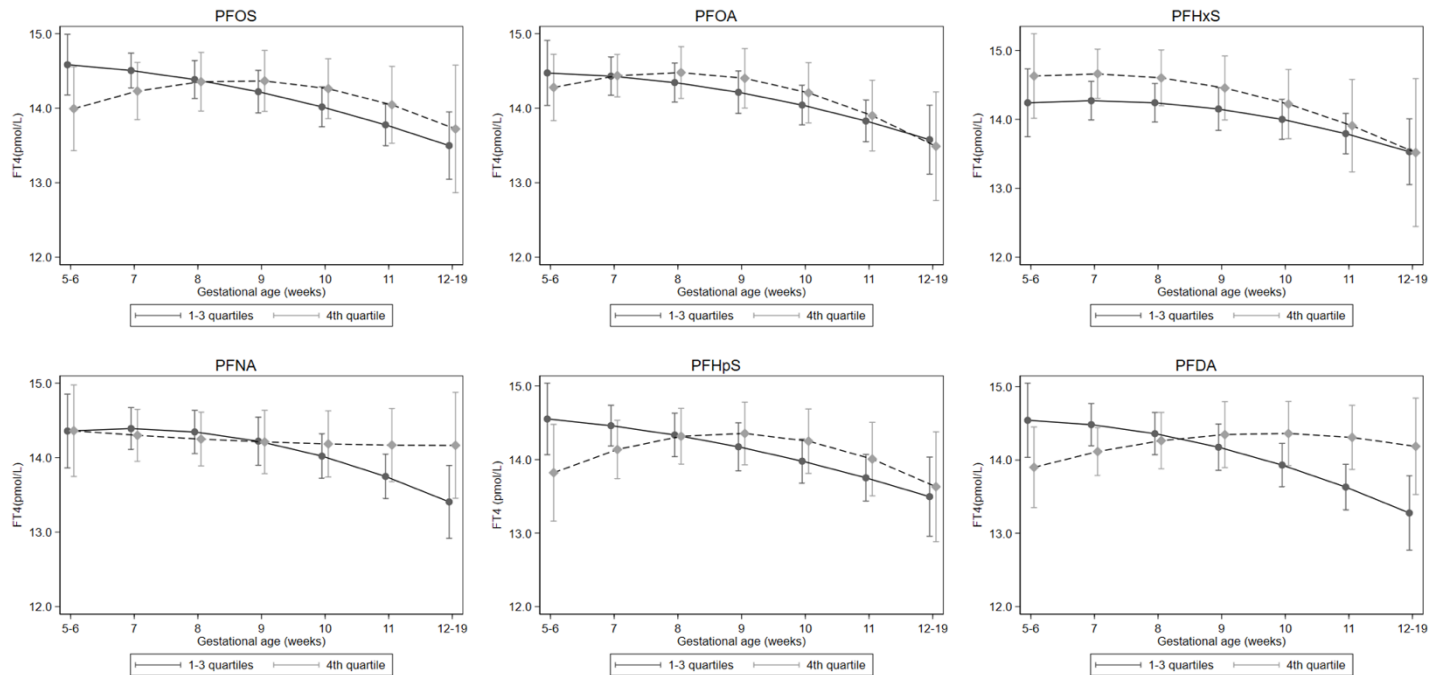

**Legend:** We estimated the expected TSH and ft4 value for each gestational week comparing the top PFAS quartile to the lowest quartile adjusting for maternal age, socio-occupational status, BMI, parity, smoke, and birth year. Study-specific distribution was used to define PFAS quartiles. The model also included the interaction terms between PFAS (binary) and gestational week (continuous value and a squared term). The bar shows 95% CI in each gestation week.

**Figure S3. Adjusted TSH and ft4 levels in each gestational week according to binary PFAS exposure, mutual adjustment of all six PFAS in the same model.**

**A) TSH**

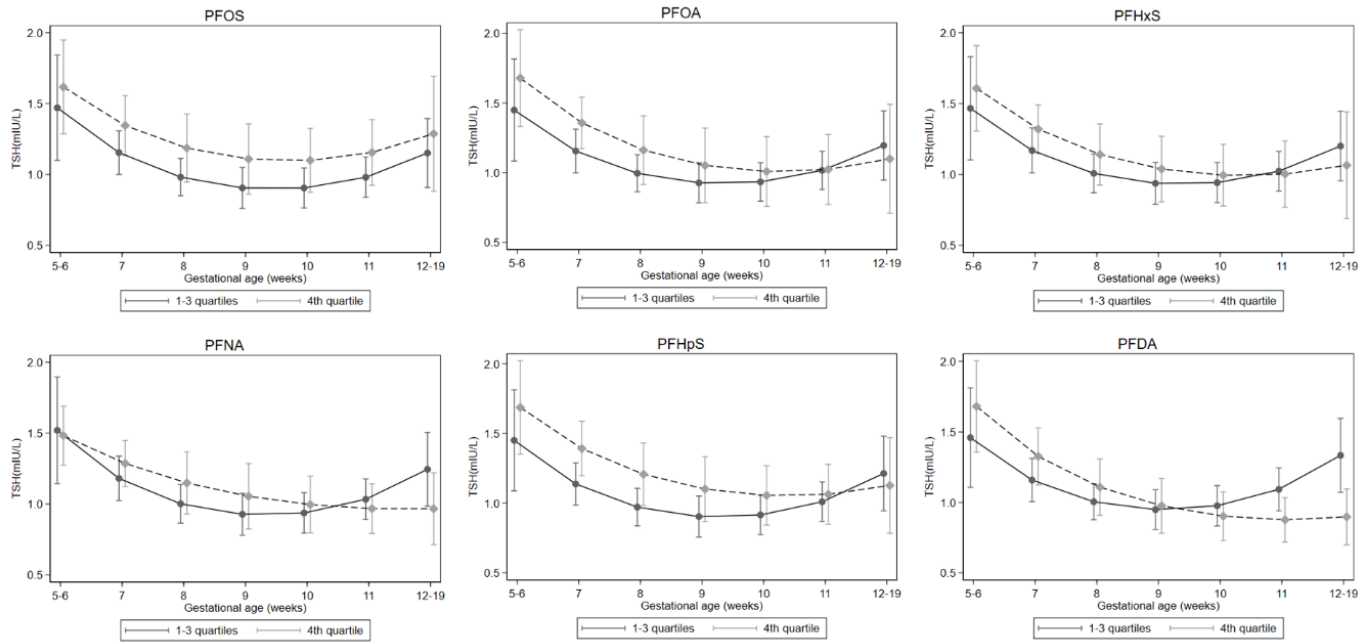

**B) ft4**

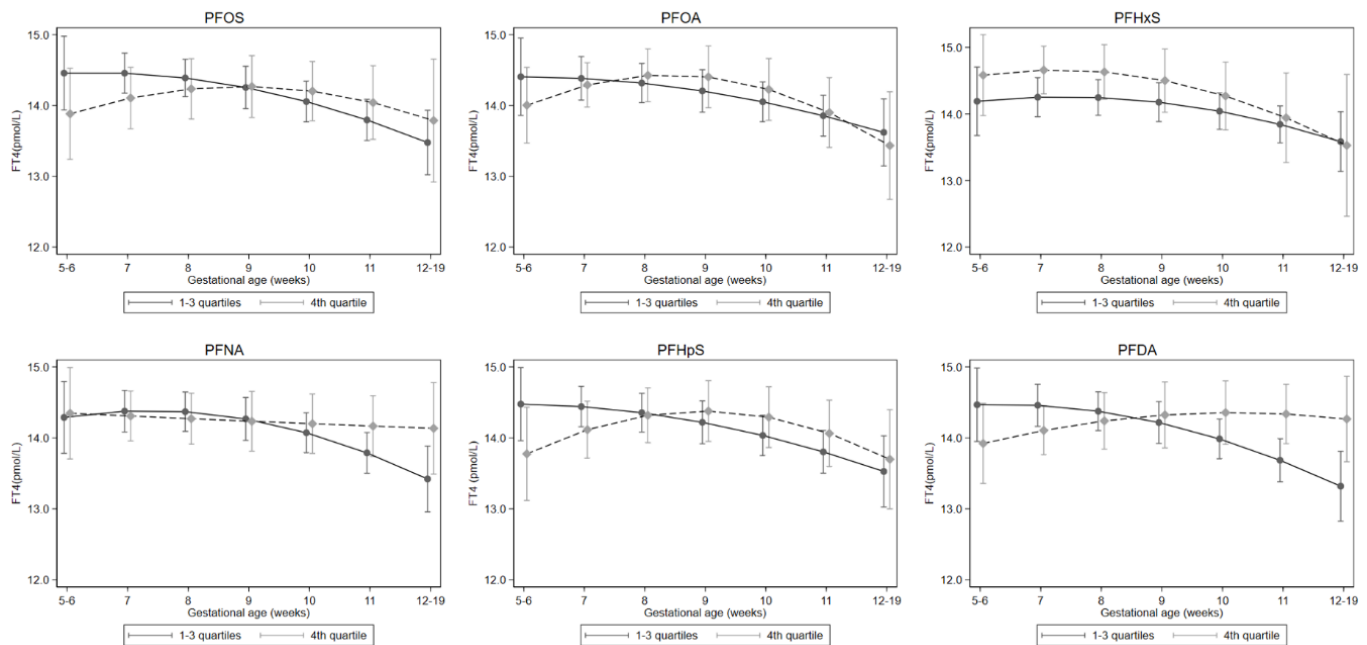

**Legend:** We estimated the expected TSH and ft4 value for each gestational week comparing the top PFAS quartile to the lowest quartile adjusting for maternal age, socio-occupational status, BMI, parity, smoke, and birth year. All of the six PFAS levels were also included in the model. Study-specific distribution was used to define PFAS quartiles. The model also included the interaction terms between PFAS (binary) and gestational week (continuous value and a squared term). The bar shows 95% CI in each gestation week.
