# Supplementary material
Source: PubMed Central journal article supplement (PMC6927503)
Supplement: ehp-127-117002-s002.pdf [file ehp-127-117002-s002.pdf]

**Note to readers with disabilities:** *EHP* strives to ensure that all journal content is accessible to all readers. However, some figures and Supplemental Material published in *EHP* articles may not conform to [508 standards](#) due to the complexity of the information being presented. If you need assistance accessing journal content, please contact [ehp508@niehs.nih.gov](mailto:ehp508@niehs.nih.gov). Our staff will work with you to assess and meet your accessibility needs within 3 working days.

### **Supplemental Material**

#### **Perfluoroalkyl Substances and Maternal Thyroid Hormones in Early Pregnancy; Findings in the Danish National Birth Cohort**

Kosuke Inoue, Beate Ritz, Stine Linding Andersen, Cecilia Høst Ramlau-Hansen, Birgit Bjerre Høyer, Bodil Hammer Bech, Tine Brink Henriksen, Eva Cecilie Bonefeld-Jørgensen, Jørn Olsen, and Zeyan Liew

#### **Table of Contents**

**Table S1.** Detection and quantitation limits of the PFAS.

**Table S2.** Study specific range of the PFAS concentrations in each quartile (ng/ml).

**Table S3.** Pearson Correlation Coefficients between the PFAS (ng/ml).

**Table S4.** Distribution of TSH and ft4 in each gestational week.

**Table S5.** Association between maternal thyroid hormones and PFAS levels (ng/ml) additionally adjusted for fish intake, geographical residence, and alcohol intake during pregnancy.

**Table S6.** Association between maternal thyroid hormones and PFAS levels in multiple PFAS models.

**Table S7.** Association between maternal thyroid hormones and PFAS levels (ng/ml) stratified by socio-economic status, parity, smoking, birth year, and geographical residence, maternal age, and alcohol intake.

**Table S8.** Estimated maternal TSH and ft4 levels in each gestational week according to high or low PFAS exposure.

**Table S9.** Association between maternal thyroid hormones and binary PFAS variables (>75<sup>th</sup> vs. ≤75<sup>th</sup> as reference) according to gestational week (<10, ≥10).

**Table S10.** Gestational week-specific high or low thyroid hormones status according to plasma PFAS levels (ng/ml) among 1,061 women included in study sample 3.

**Table S11.** Gestational week-specific high or low thyroid hormones status according to plasma PFAS levels (ng/ml) excluding women with thyroid diseases (n=1,329).

**Figure S1.** The directed acyclic graph constructed for this study.

**Figure S2.** Adjusted TSH and fT4 levels in each gestational week according to PFAS levels (the 1<sup>st</sup> quartile vs the 4<sup>th</sup> quartile).

**Figure S3.** Adjusted TSH and fT4 levels in each gestational week according to binary PFAS exposure, mutual adjustment of all six PFAS in the same model.
